# Supplementary material
Source: Springer Nature journal article supplement (https://www.springermedizin.de/resource/supplementary/12885_2008_1167_MOESM8_ESM.pdf/9471296)

### BiP

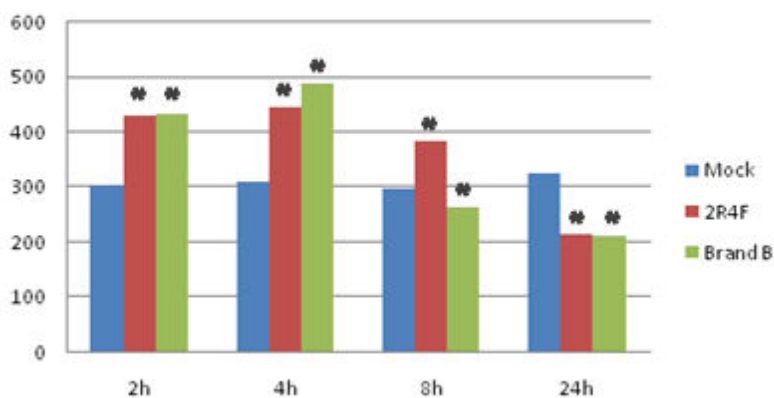

### XBP1

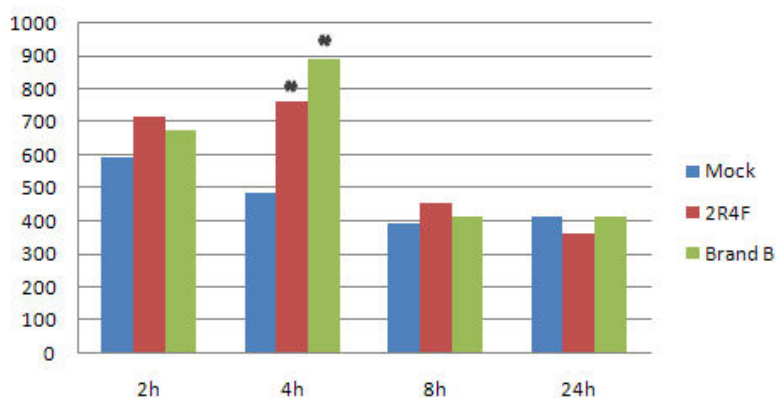

### grp94

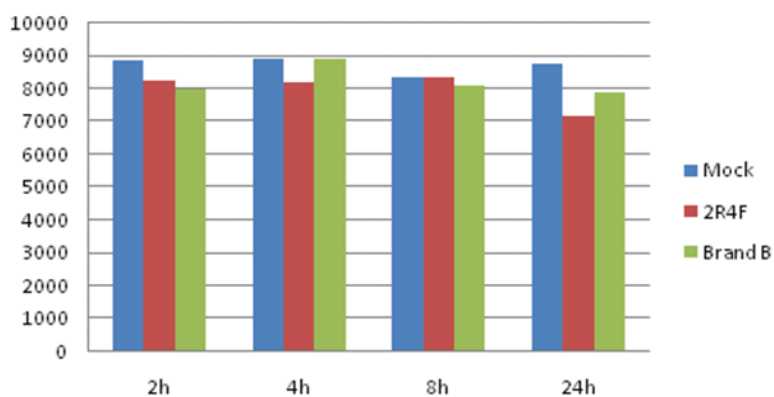

Supplement: MOESM8 [file 9471296]
